# Supplementary material for: Long-term perturbation of the peripheral immune system months after SARS-CoV-2 infection
Source: bioRxiv or medRxiv preprint supplement (doi:10.1101/2021.07.30.21261234), 2021-08-03

# Platelet activation, signaling & aggregation

## A

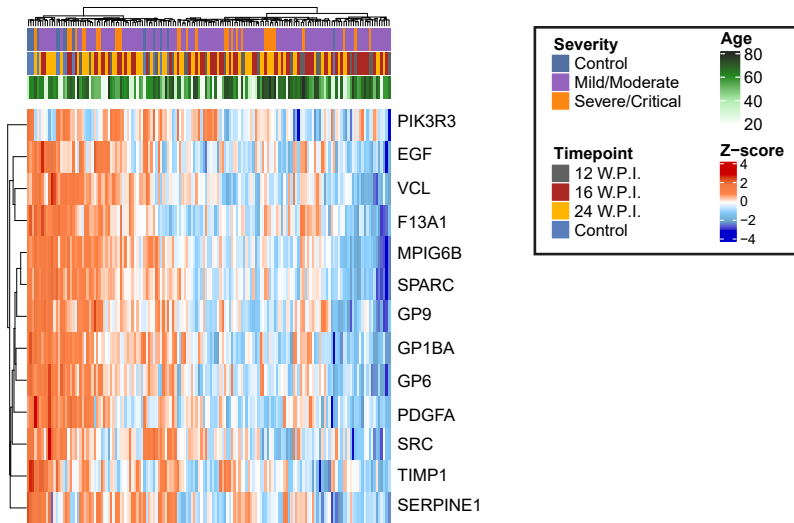

# Oxidative phosphorylation

## B

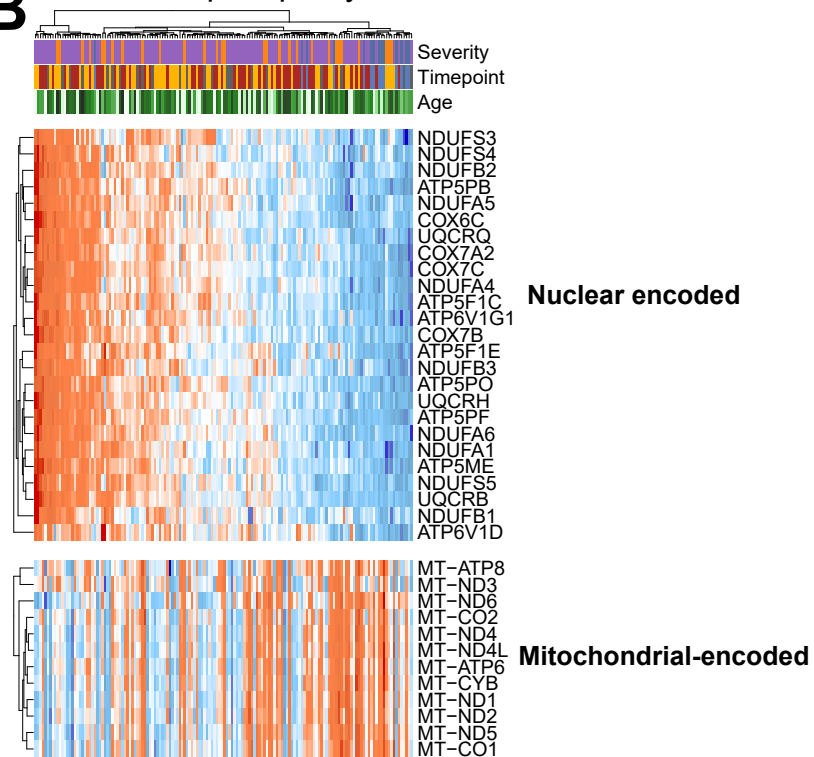

Supplement: Supplementary file [file media-4.pdf]
