# Supplementary material for: Long-term perturbation of the peripheral immune system months after SARS-CoV-2 infection
Source: bioRxiv or medRxiv preprint supplement (doi:10.1101/2021.07.30.21261234), 2021-08-03

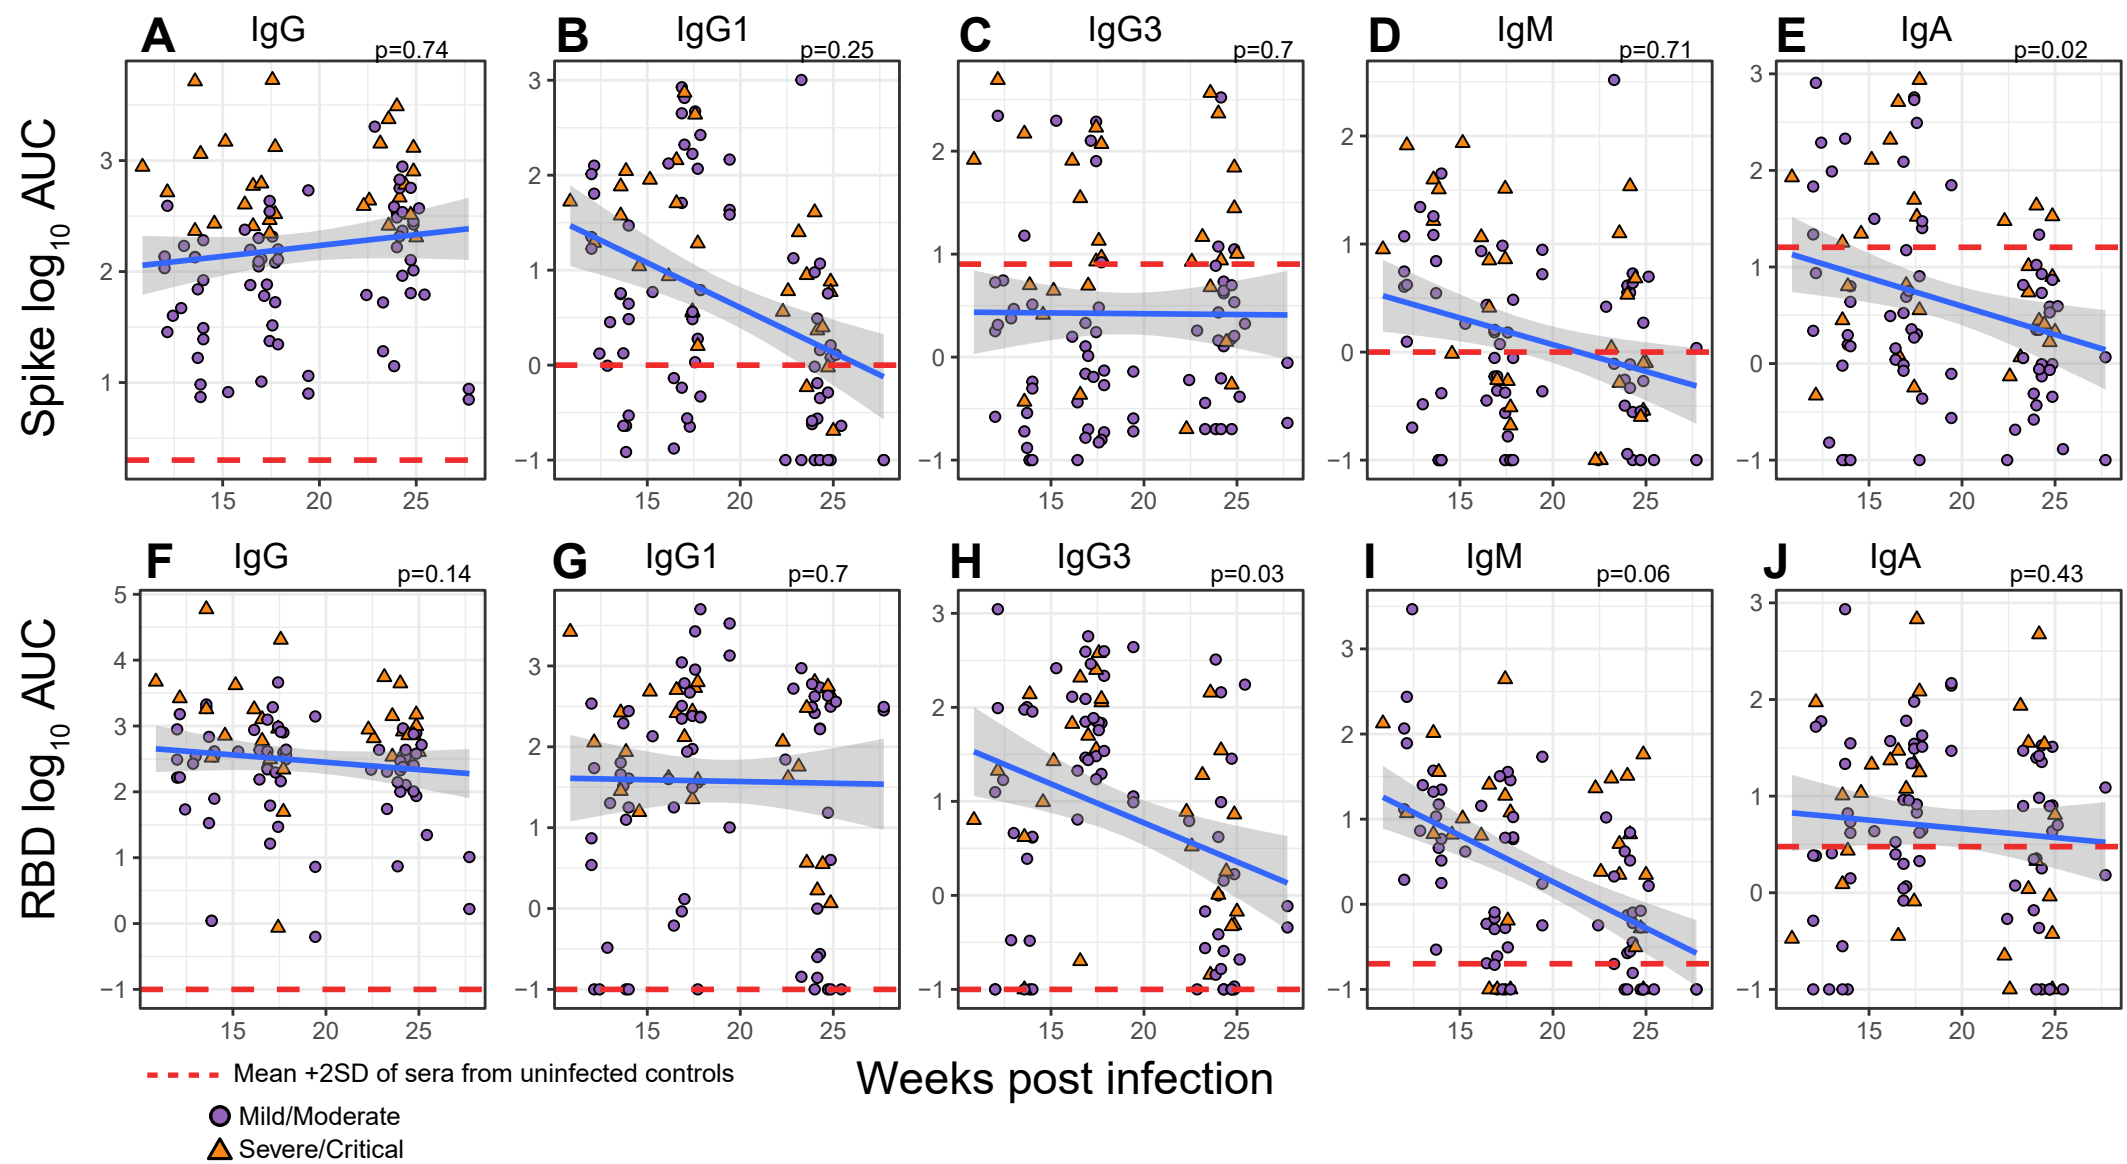

Supplement: Supplementary file [file media-6.pdf]
